# Supplementary material for: An initiator loaded separator triggering in situ polymerization of a poly(1,3-dioxolane) quasi-solid electrolyte for lithium metal batteries
Source: Royal Society of Chemistry journal article supplement (doi:10.1039/d4cp01091d), 2024-01-01
Supplement: d4cp01091d1.pdf [file d4cp01091d1.pdf]

Supporting Information

Initiator loaded separator triggering in-situ polymerization of poly(1,3-dioxolane) quasi-solid electrolyte for lithium metal batteries

Hao Huang<sup>a,b</sup>, Chaohui Wei<sup>b</sup>, Qiang Zhao<sup>a,b</sup>, Aijun Zhou<sup>a,b</sup>, Jingze Li<sup>a,b\*</sup>

a School of Materials and Energy, University of Electronic Science and Technology of China, Chengdu 611731, P. R. China

b Huzhou Key Laboratory of Smart and Clean Energy, Yangtze Delta Region Institute (Huzhou), University of Electronic Science and Technology of China, Huzhou 313001, P. R. China

Corresponding author E-mail: [lijingze@uestc.edu.cn](mailto:lijingze@uestc.edu.cn) (J. Z. Li)

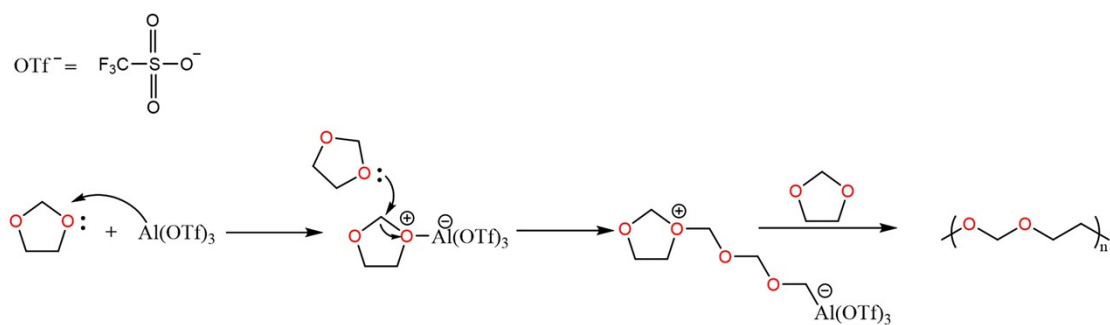

Fig. S1. Illustration of the reaction mechanism of DOL in situ polymerization.

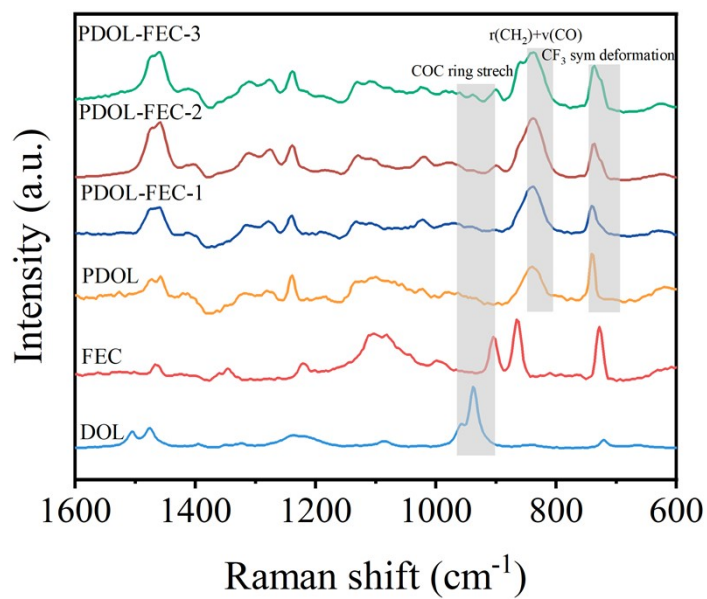

Fig. S2 Raman spectra of different electrolytes.

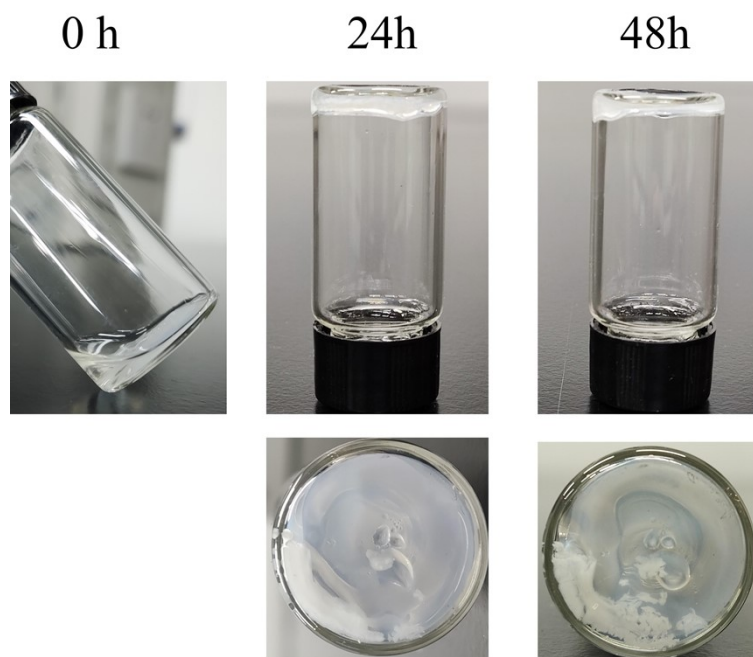

Fig. S3 Digital images of DOL precursor in the bottle before and after  $\text{Al}(\text{OTf})_3$  loaded separator initiated polymerization for 24 and 48h.

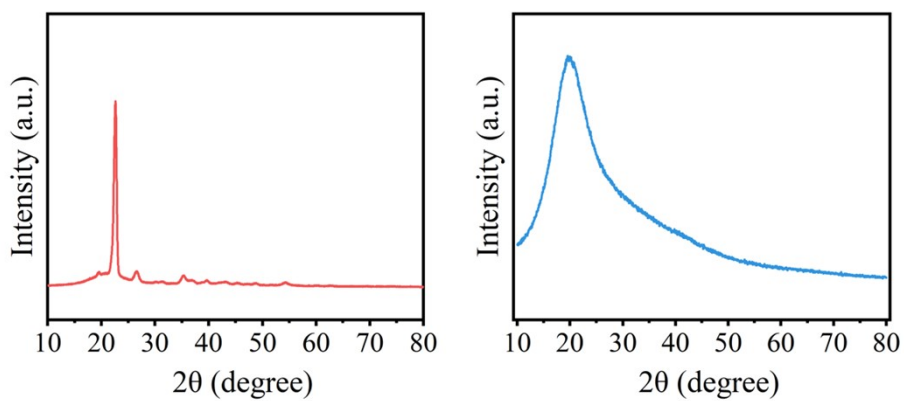

Fig. S4 XRD patterns of different parts of the GPE. (a) near the separator and (b) away from the separator.

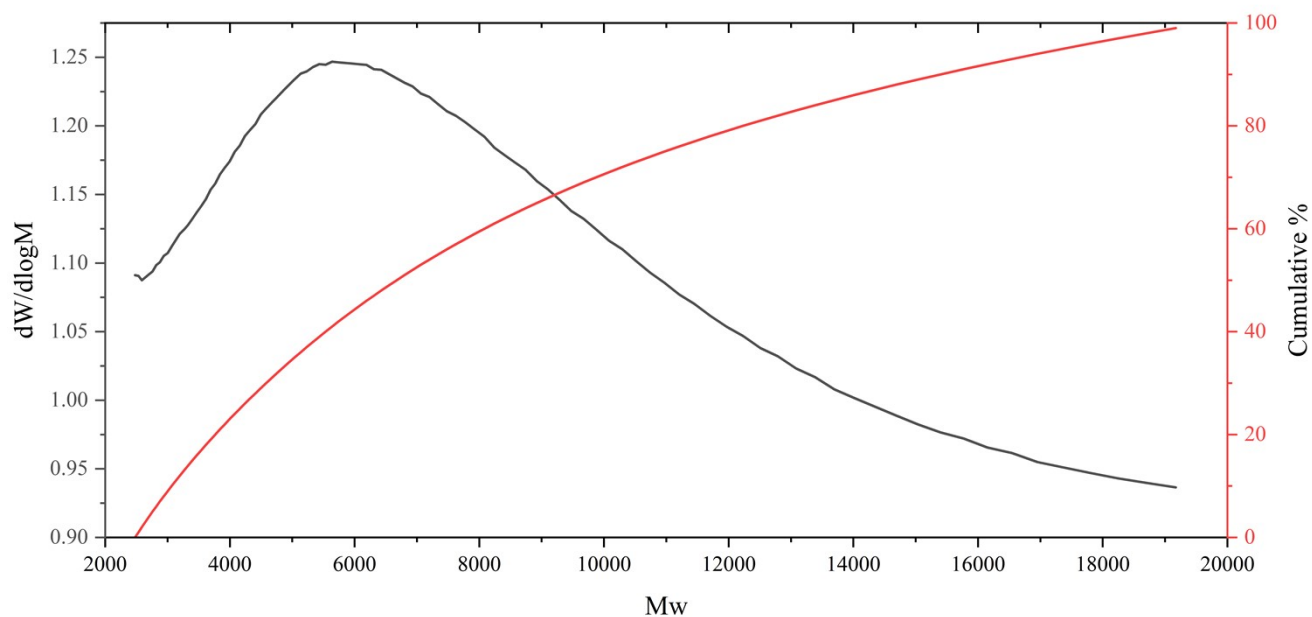

|            | Mn   | Mw   | Mw/Mn |
|------------|------|------|-------|
| PDOL-FEC-2 | 5739 | 7949 | 1.38  |

Fig. S5. GPC data of PDOL-FEC-2 with THF as the solvent.

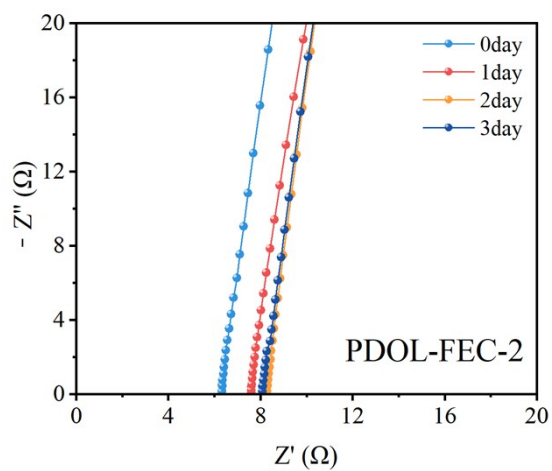

Fig. S6. EIS spectra of SS|PDOL-FEC-2|SS cell at room temperature as a function of the storage time.

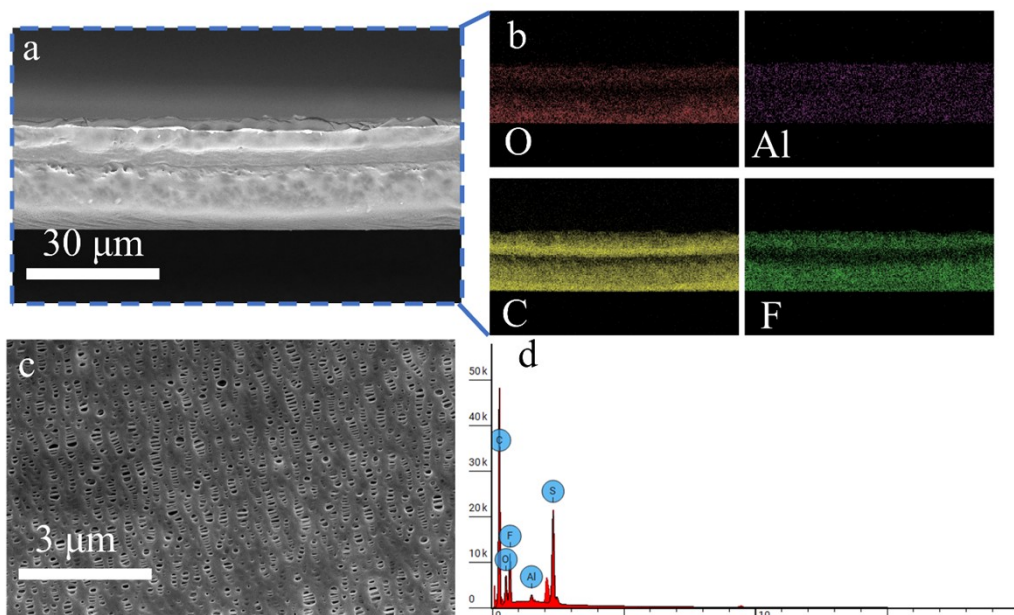

Fig. S7 (a) Cross-section SEM image of the Al (OTf)<sub>3</sub>-loaded separator. (b) Cross-section EDS mapping images of the cross-section of the Al (OTf)<sub>3</sub>-loaded separator. (c) Top-view SEM image of the PP separator. (d) EDS curve of the composite separator.

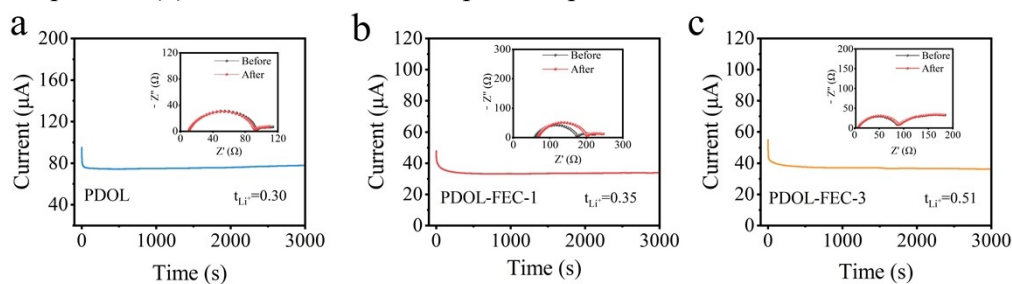

Fig. S8 chronoamperometry curves with a step voltage of 10 mV of cells with (a)PDOL, (b)PDOL-FEC-1, and (c)PDOL-FEC-3. The insets displayed EIS plots before and after polarization.

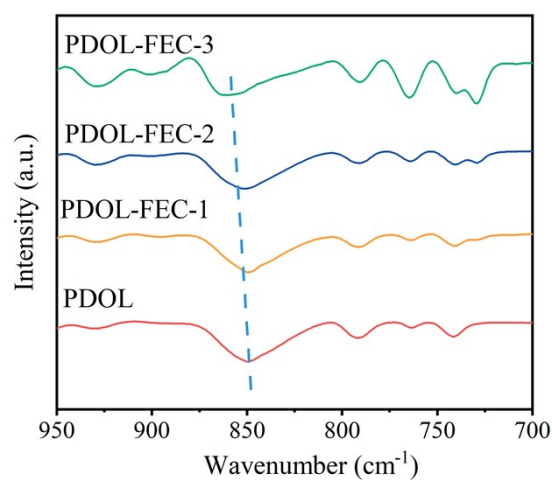

Fig. S9. FTIR spectra of PDOL, PDOL-FEC-1, PDOL-FEC-2, and PDOL-FEC-3.

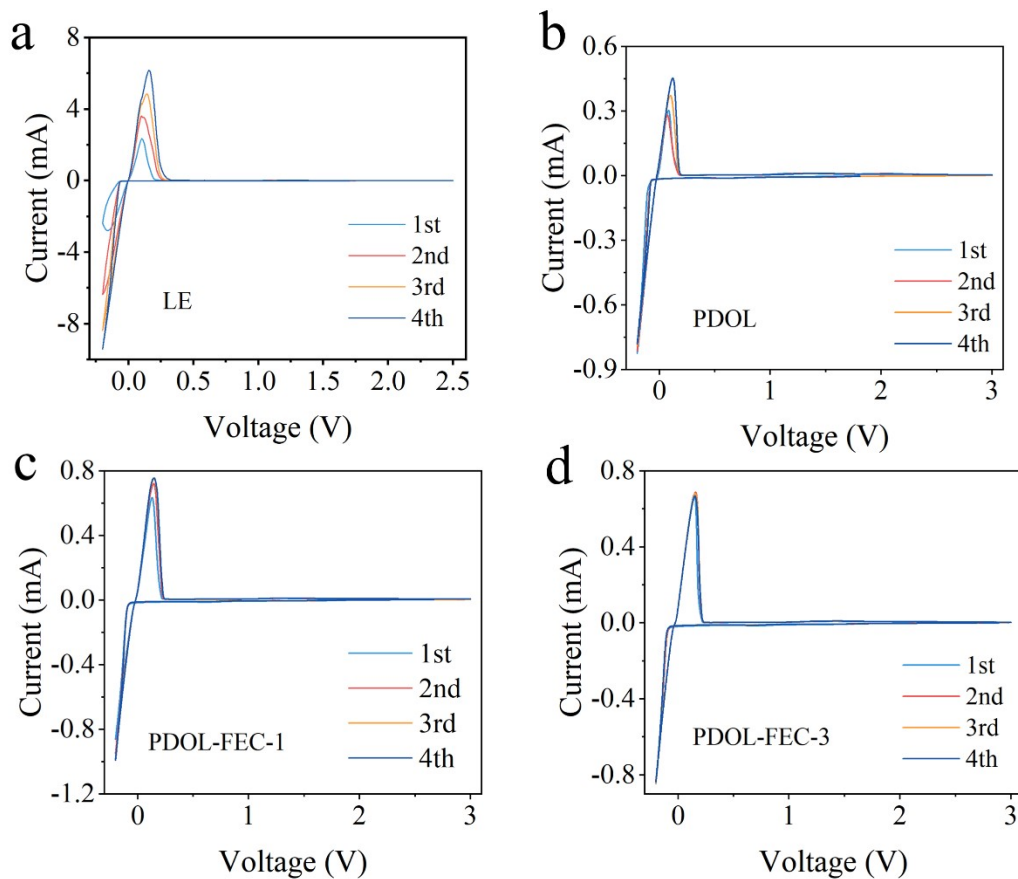

Fig. S10. CV curves of the Li|SS cells with (a)LE, (b)PDOL, (c)PDOL-FEC-1, and (d)PDOL-FEC-3.

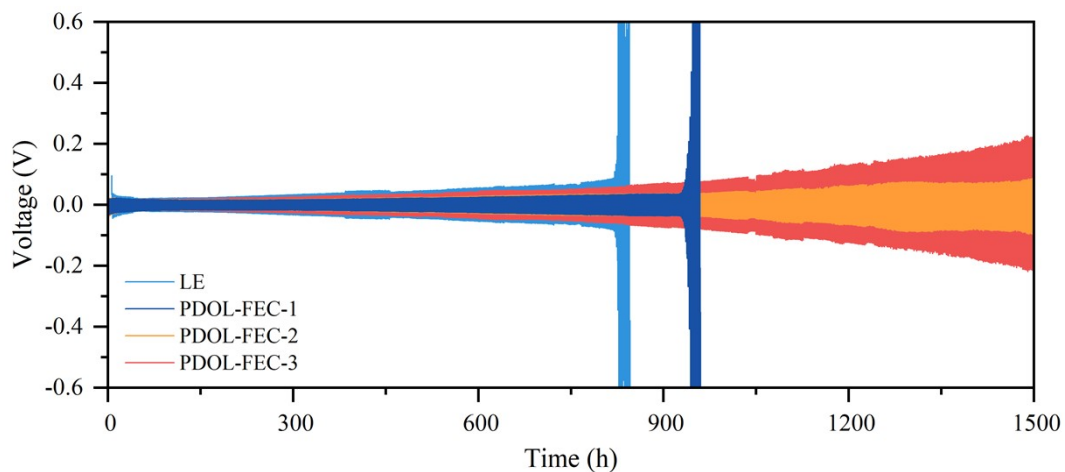

Fig. S11. Voltage profiles of Li//Li symmetrical cells that contain different electrolytes at room temperature with the current density of  $0.5 \text{ mAh cm}^{-2}$ .

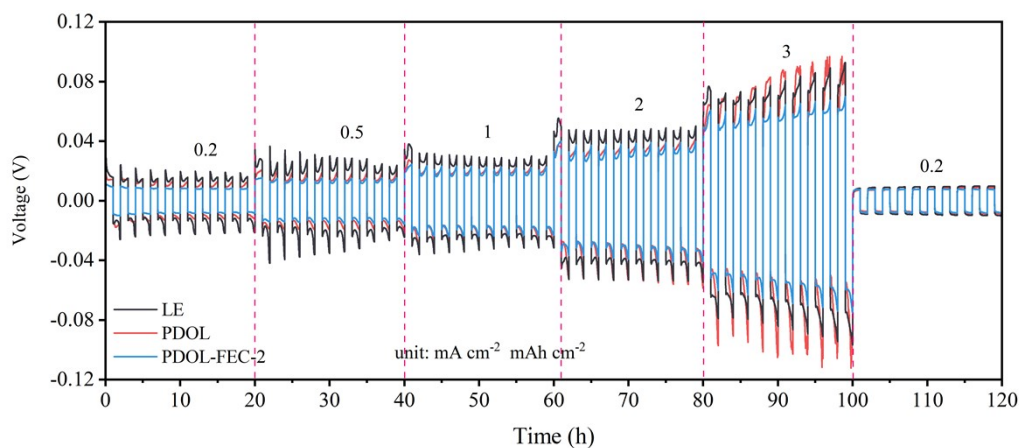

Fig. S12. Voltage profiles of Li||Li cells at different current densities.

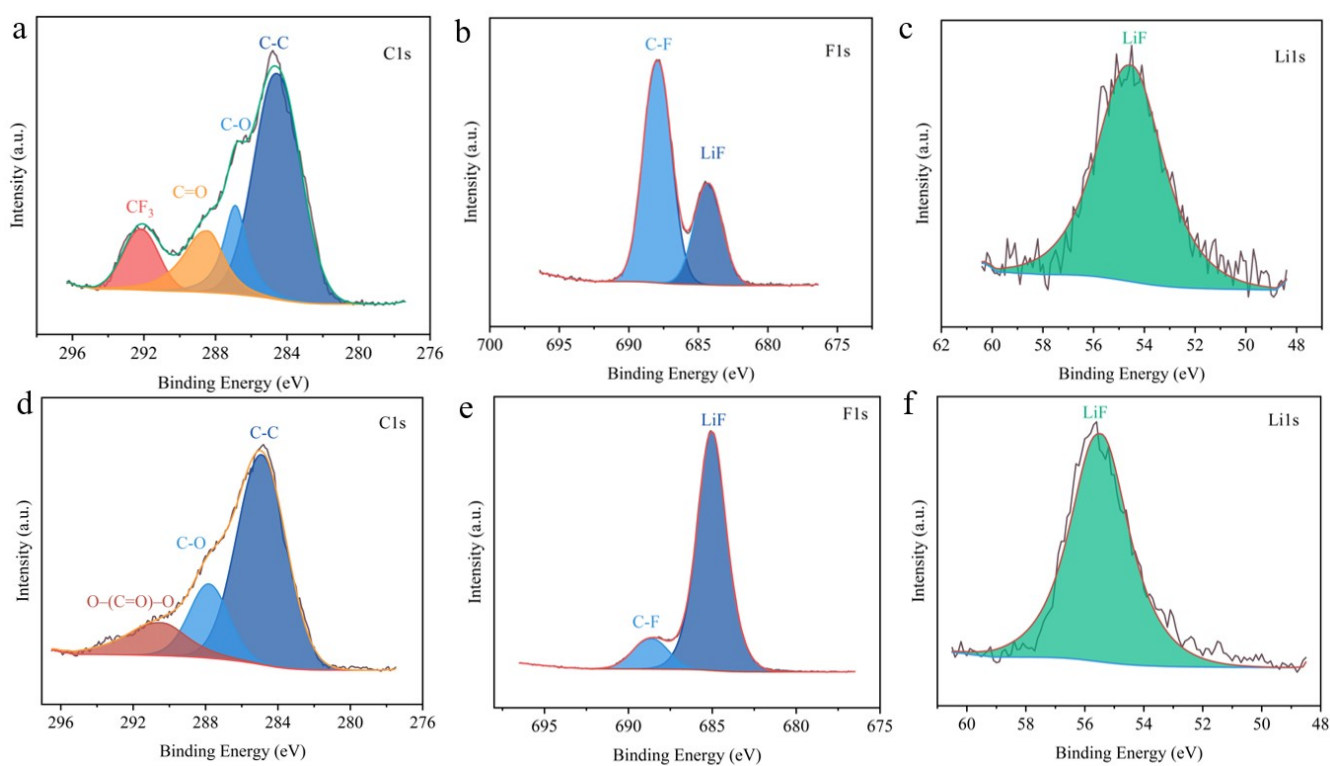

Fig S13 XPS spectra (C 1s, F 1s and Li 1s spectra) of the Li metal surface from the cycled Li||Li cells after 50 h at  $1 \text{ mA cm}^{-2}$  for  $1 \text{ mA h cm}^{-2}$ : (a , b and c) LE cell and (d, e and f) GPE cell (PDOL-FEC-2)

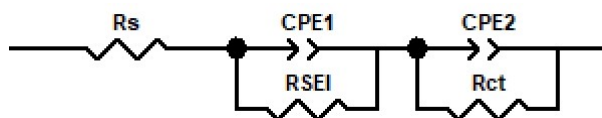

Fig. S14 Equivalent circuit for fitting Nyquist plots of Li||Li symmetric cells.

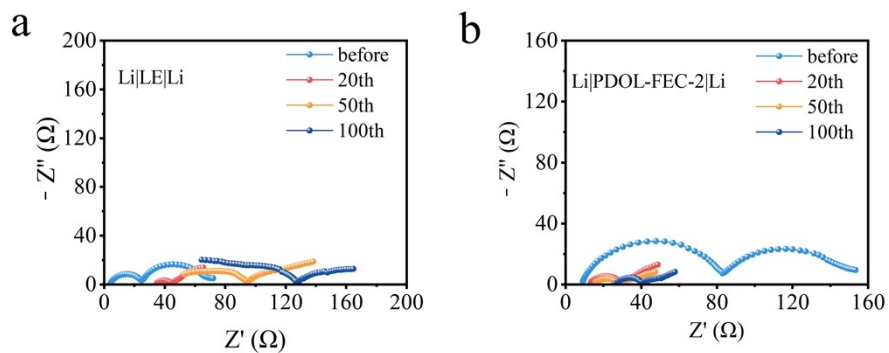

Fig. S15. The EIS of Li/Li cells with the LE (a) and (b) PDOL-FEC-2.

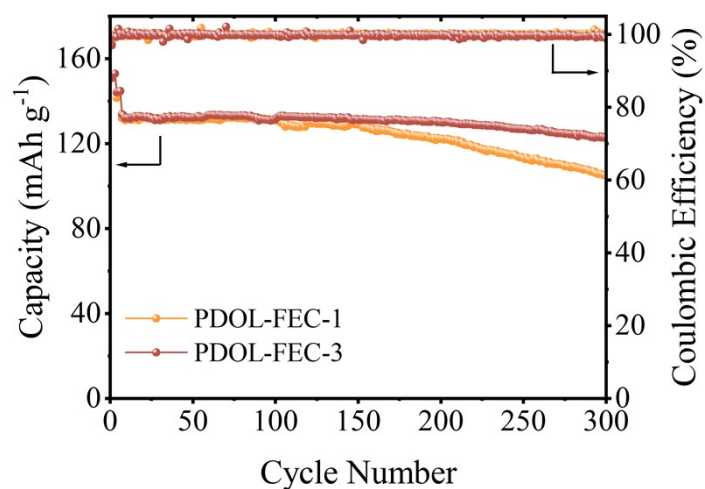

Fig. S16. Cycling performances and CE of the LFP||Li cell at room temperature with PDOL-FEC-1 and PDOL-FEC-3 electrolytes at 1 C.

Table S1 Liquid content of different electrolytes

| Sample     | liquid content. |
|------------|-----------------|
| PDOL       | 2.2%            |
| PDOL-FEC-1 | 4.5%            |
| PDOL-FEC-2 | 9.2%            |
| PDOL-FEC-3 | 10.2%           |

Table S2 The fitted EIS parameters of Li|LE|Li and Li|PDOL-FEC-2|Li batteries

|          |        | $R_s$ | $R_{SEI}$ | $R_{ct}$ |
|----------|--------|-------|-----------|----------|
| Li LE Li | Before | 4.238 | 19.72     | 46.35    |
|          | 20th   | 9.911 | 6.362     | 4.229    |



|          |        |       |       |       |
|----------|--------|-------|-------|-------|
|          | 50th   | 13.81 | 8.716 | 5.186 |
|          | 100th  | 28.47 | 12.36 | 6.782 |
| Li PDOL- | Before | 8.459 | 75.08 | 61.84 |
| FEC-2 Li | 20th   | 12.63 | 16.66 | 16.25 |
|          | 50th   | 16.14 | 11.55 | 16.75 |
|          | 100th  | 27.41 | 12.53 | 17.71 |

Table S3 Comparison of our work with previously reported PDOL-based electrolytes via in-situ polymerization

| Electrolyte                   | Initiator                                        | Ionic Conductivity, $t_{Li^+}$                                  | Li//Li cell performance                                          | Battery performance                               | Ref          |
|-------------------------------|--------------------------------------------------|-----------------------------------------------------------------|------------------------------------------------------------------|---------------------------------------------------|--------------|
| 2 M LiTFSI +DOL               | 0.5mM Al (OTf) <sub>3</sub>                      | $1 \times 10^{-3} \text{ S cm}^{-1}$                            | 400 h; 1.0 mA cm <sup>-2</sup> , 1.0 mAh cm <sup>-2</sup>        | 1 C, 700 cycles                                   | <sup>1</sup> |
| DOL+DME +1M LiTFSI            | 2M LiPF <sub>6</sub>                             | $5.50 \times 10^{-4} \text{ S cm}^{-1}$                         | 400 h; 1.0 mA cm <sup>-2</sup> , 1.0 mAh cm <sup>-2</sup>        | 0.5 C, 700 cycles, capacity retention:95.6%       | <sup>2</sup> |
| DOL/FEC (v/v=10:1) +2M LiTFSI | 0.43mM Al(OTf) <sub>3</sub>                      | $2.4 \times 10^{-5} \text{ S cm}^{-1}$ at -60 °C; 0.55 at -20°C | 850 h; 0.2 mA cm <sup>-2</sup> , 0.2 mAh cm <sup>-2</sup> at 0°C | 0.2 C, 400 cycles, capacity retention:96% at 0 °C | <sup>3</sup> |
| 2 M LiTFSI +DOL               | Sc(OTf) <sub>3</sub>                             | $1.07 \times 10^{-3} \text{ S cm}^{-1}$                         | /                                                                | 1 C, 200 cycles, capacity retention:92.3%         | <sup>4</sup> |
| 2 M LiTFSI +DOL               | 0.4mM Al (OTf) <sub>3</sub>                      | $2.39 \times 10^{-3} \text{ S cm}^{-1}$                         | 250 h; 0.5 mA cm <sup>-2</sup> , 1.0 mAh cm <sup>-2</sup>        | 1 C, 200 cycles, capacity retention:69.96%        | <sup>5</sup> |
| DOL+DME+1M LiTFSI             | acid-treated nano Al <sub>2</sub> O <sub>3</sub> | $3.37 \times 10^{-3} \text{ S cm}^{-1}$ ; 0.74                  | 1000 h; 1.0 mA cm <sup>-2</sup> , 1.0 mAh cm <sup>-2</sup>       | 200cycles, capacity retention:82.1%               | <sup>6</sup> |
| DOL+SCN+FEC +1 M LiTFSI       | 0.4 M LiBF <sub>4</sub>                          | $1.95 \times 10^{-4} \text{ S cm}^{-1}$ ; 0.36                  | 600 h; 0.2 mA cm <sup>-2</sup> , 0.2 mAh cm <sup>-2</sup>        | 0.5C,1000 cycles, capacity retention:80%          | <sup>7</sup> |
| DOL/FEC (v/v=10:2) +1M LiTFSI | Al (OTf) <sub>3</sub>                            | $1.5 \times 10^{-4} \text{ S cm}^{-1}$ ; 0.63                   | 650 h; 1.0 mA cm <sup>-2</sup> , 1.0 mAh cm <sup>-2</sup>        | 1C, 300 cycles, capacity retention:94.5%          | This work    |

1. Q. Zhao, X. T. Liu, S. Stalin, K. Khan and L. A. Archer, *Nature Energy*, 2019, **4**, 365-373.
2. F. Q. Liu, W. P. Wang, Y. X. Yin, S. F. Zhang, J. L. Shi, L. Wang, X. D. Zhang, Y. Zheng, J. J. Zhou,

- L. Li and Y. G. Guo, *Science Advances*, 2018, **4**, eaat5383.
3. W. Ren, Y. Zhang, R. Lv, S. Guo, W. Wu, Y. Liu and J. Wang, *Journal of Power Sources*, 2022, **542**, 231773.
  4. G. Yang, Y. Zhai, J. Yao, S. Song, L. Lin, W. Tang, Z. Wen, N. Hu and L. J. C. C. Lu, *Chemical Communications*, 2021, **57**, 7934-7937.
  5. D. Chen, M. Zhu, P. Kang, T. Zhu, H. Yuan, J. Lan, X. Yang and G. J. A. S. Sui, *Advanced Science* 2022, **9**, 2103663.
  6. S. Wang, L. Zhou, M. K. Tufail, L. Yang, P. Zhai, R. Chen and W. J. C. E. J. Yang, 2021, **415**, 128846.
  7. Y. Bai, W. Ma, W. Dong, Y. Wu, X. Wang and F. Huang, *ACS Appl Mater Interfaces*, 2023, **15**, 26834-26842.
